# Supplementary figures and images for: Effect of Ecoliteracy on Farmers’ Participation in Pesticide Packaging Waste Governance Behavior: Evidence from Rural North China
Source: Research Square preprint supplement (doi:10.21203/rs.3.rs-4091880/v1), 2024-04-04

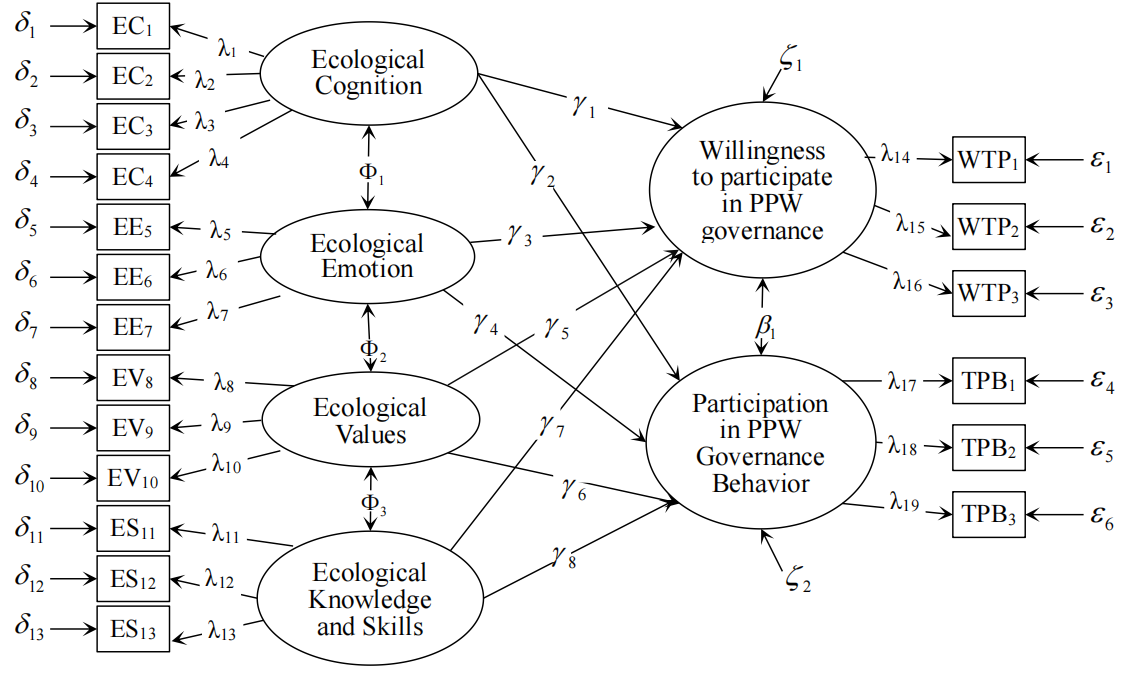


Figure. S1. Structural equation model of farmers’ participation in PPW governance behavior.

Supplement: Supplementary file 1 [file 4dbd94680fc535ea470bd1f5.docx]
